# Supplementary material for: Development of Hybrid Electrodes Based on a Ti/TiO2 Mesoporous/Reduced Graphene Oxide Structure for Enhanced Electrochemical Applications
Source: MDPI journal article supplement (doi:10.3390/coatings13081359), 2023-08-03
Supplement: s1 [file s1]

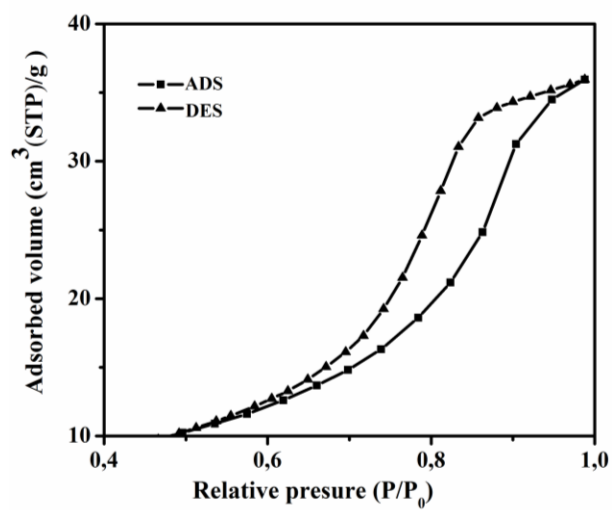

(a)

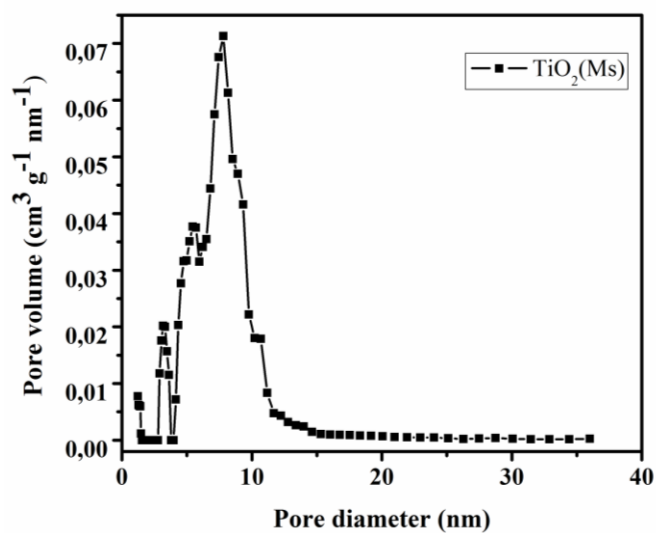

(b)

**Figure S1.**  $N_2$  adsorption-desorption isotherm curve (a) and pore size distribution curve (b) of the  $TiO_2$  (Ms).
